# Supplementary material
Source: PubMed Central journal article supplement (PMC6484793)
Supplement: jamasurg-154-305-s001.pdf [file jamasurg-154-305-s001.pdf]

## Supplementary Online Content

Tessler RA, Arbabi S, Bulger EM, Mills B, Rivara FP. Trends in firearm injury and motor vehicle crash case fatality by age group, 2003-2013. *JAMA Surg*. Published online December 19, 2018. doi:10.1001/jamasurg.2018.4685

**eTable 1.** Annual Case-Fatality Percentage (95% CI) by Mechanism, Ages 15 Years and Older

**eTable 2.** Survey Weighted Total Deaths, Injuries, and Case-Fatality by Mechanism and Age Group, 2003-2013, NTDB NSP

**eTable 3.** Annual Trends in Case-Fatality by Mechanism and ISS Category

**eTable 4.** Sensitivity Analysis, Durbin-Watson Statistic and Annual Change in Case Fatality Percentage Overall and by Age-Groups (2003-2013) Using Prais-Winsten Method

**eTable 5.** Sensitivity Analysis, Durbin-Watson Statistic and Annual Change in Percentage of Out-of-Hospital Deaths by Mechanism (2003-2013)

This supplementary material has been provided by the authors to give readers additional information about their work.

| <b>eTable1. Annual Case-Fatality Percentage (95% CI) by Mechanism, Ages 15 Years and Older</b> |                                     |                        |                        |                                     |
|------------------------------------------------------------------------------------------------|-------------------------------------|------------------------|------------------------|-------------------------------------|
| <b>Year</b>                                                                                    | <b>Occupant Motor Vehicle Crash</b> | <b>Firearm Assault</b> | <b>Firearm Suicide</b> | <b>Unintentional Firearm Injury</b> |
| 2003                                                                                           | 5.5 (4.8, 6.3)                      | 12.3 (10.4, 14.5)      | 43.7 (38.3, 49.4)      | 1.9 (1.4, 2.5)                      |
| 2004                                                                                           | 5.2 (4.3, 6.2)                      | 9.0 (5.9, 13.6)        | 38.6 (31.8, 45.9)      | 4.4 (2.2, 8.5)                      |
| 2005                                                                                           | 4.2 (3.6, 4.9)                      | 12.6 (9.4, 16.9)       | 46.5 (41.0, 52.2)      | 3.3 (1.8, 5.9)                      |
| 2006                                                                                           | 4.0 (3.6, 4.6)                      | 14.4 (11.9, 17.4)      | 40.8 (33.4, 48.6)      | 2.9 (1.6, 5.5)                      |
| 2007                                                                                           | 4.7 (4.1, 5.3)                      | 12.9 (11.3, 14.6)      | 49.4 (40.0, 58.8)      | 3.2 (2.0, 5.1)                      |
| 2008                                                                                           | 4.8 (4.3, 5.2)                      | 12.6 (10.4, 15.3)      | 41.1 (37.1, 45.9)      | 2.4 (1.3, 4.2)                      |
| 2009                                                                                           | 4.2 (3.7, 4.8)                      | 10.4 (8.9, 12.1)       | 40.5 (37.8, 43.3)      | 3.2 (1.9, 5.2)                      |
| 2010                                                                                           | 3.6 (3.0, 4.2)                      | 9.8 (6.9, 13.8)        | 47.3 (44.1, 50.4)      | 2.4 (1.5, 4.0)                      |
| 2011                                                                                           | 3.9 (3.3, 3.6)                      | 10.9 (7.9, 14.9)       | 47.4 (42.5, 52.3)      | 9.8 (8.8, 11.0)                     |
| 2012                                                                                           | 4.1 (3.7, 4.6)                      | 11.9 (9.3, 15.3)       | 43.6 (40.1, 47.2)      | 2.0 (1.2, 3.4)                      |
| 2013                                                                                           | 2.6 (2.3, 3.0)                      | 4.7 (3.6, 6.1)         | 29.2 (24.7, 34.2)      | 1.2 (0.6, 2.3)                      |

**eTable 2. Survey Weighted Total Deaths, Injuries, and Case-Fatality by Mechanism and Age Group, 2003-2013, NTDB NSP**

| Mechanism                    | Deaths               | Injuries                | Case Fatality     |
|------------------------------|----------------------|-------------------------|-------------------|
|                              | N (95% CI)           | N (95% CI)              | % (95% CI)        |
| <i>Ages 15-34</i>            | 31767 (26373, 37161) | 652972 (564308, 741637) | 4.9 (4.5, 5.3)    |
| Occupant Motor Vehicle Crash | 17071 (14724, 19418) | 531663 (467154, 596171) | 3.2 (2.9, 3.6)    |
| Assault with Firearm         | 10660 (7382, 13938)  | 102627 (72454, 132800)  | 10.4 (9.8, 11.2)  |
| Self-Inflicted Firearm       | 3619 (3120, 4119)    | 9826 (7997, 11655)      | 37.2 (34.6, 39.8) |
| Unintentional Firearm        | 417 (339, 494)       | 8857 (7642, 10071)      | 4.7 (4.1, 5.4)    |
| <i>Ages 35-54</i>            | 18270 (15497, 21044) | 385749 (334114, 437385) | 4.8 (4.4, 5.2)    |
| Occupant Motor Vehicle Crash | 11552 (9814, 13291)  | 347170 (302552, 391788) | 3.4 (3.0, 3.7)    |
| Assault with Firearm         | 3236 (2388, 4084)    | 26014 (18668, 33361)    | 12.5 (11.3, 13.8) |
| Self-Inflicted Firearm       | 3412 (2993, 3831)    | 8367 (6901, 9833)       | 41.0 (38.4, 43.7) |
| Unintentional Firearm        | 71 (35, 106)         | 4198 (3450, 4946)       | 1.7 (1.1, 2.7)    |
| <i>Ages ≥55</i>              | 24891 (21512, 28270) | 296323 (255902, 336744) | 8.5 (7.9, 9.3)    |
| Occupant Motor Vehicle Crash | 20671 (17810, 23533) | 283164 (244536, 321792) | 7.4 (6.7, 8.2)    |
| Assault with Firearm         | 823 (679, 968)       | 4648 (3396, 5900)       | 17.9 (16.2, 19.8) |
| Self-Inflicted Firearm       | 3342 (2737, 3947)    | 6183 (5285, 7081)       | 54.3 (50.1, 58.4) |
| Unintentional Firearm        | 55 (32, 77)          | 2327 (1874, 2781)       | 2.4 (1.6, 3.5)    |

| <b>eTable 3. Annual Trends in Case-Fatality by Mechanism and ISS Category</b>                                                                                                                                   |                         |                        |                                |                                     |
|-----------------------------------------------------------------------------------------------------------------------------------------------------------------------------------------------------------------|-------------------------|------------------------|--------------------------------|-------------------------------------|
| <b>ISS category</b>                                                                                                                                                                                             | <b>Occupant MVC</b>     | <b>Firearm Assault</b> | <b>Self-inflicted Firearms</b> | <b>Unintentional Firearm Injury</b> |
| 1-15                                                                                                                                                                                                            | -0.09 (-0.15, -0.03)*¥  | -0.16 (-0.41, 0.08)¥   | -0.52 (-1.04, -0.00)*¥         | -0.00 (-0.14, 0.13)¥                |
| 16-24                                                                                                                                                                                                           | -0.30 (-0.51, -0.009)*¥ | 0.58 (-0.26, 1.42)¥    | -1.36 (-2.59, -0.14)*¥         | 0.41 (-1.05, 1.87)¥                 |
| 25-40                                                                                                                                                                                                           | -0.52 (-1.19, 0.15)¥    | -0.04 (-2.26, 2.17)¥   | -0.07 (-1.44, 1.29)¥           | 0.30 (-2.34, 2.94)¥                 |
| 41-66                                                                                                                                                                                                           | -0.72 (-1.22, -0.21)*¥  | 0.04 (-2.84, 2.93)¥    | -0.87 (-4.19, 2.45)¥           | Insufficient observations**         |
| 67-75                                                                                                                                                                                                           | -0.87 (-1.39, -0.35)*   | 0.12 (-4.26, 4.51)¥    | -1.75 (-5.35, 1.86)¥           | -0.53 (-3.48, 2.43)¥                |
| All models are run as ordinary least squares with 2-year moving averages and tested against the Durbin-Watson statistic. Results from Prais-Winsten models are shown when the Durbin Watson statistic was <1.95 |                         |                        |                                |                                     |
| *p<0.05                                                                                                                                                                                                         |                         |                        |                                |                                     |
| ** Multiple years with no deaths and/or no injuries                                                                                                                                                             |                         |                        |                                |                                     |
| ¥Prais-Winsten-Winsten Model                                                                                                                                                                                    |                         |                        |                                |                                     |

**eTable 4. Sensitivity Analysis, Durbin-Watson Statistic and Annual Change in Case Fatality Percentage Overall and by Age-Groups (2003-2013) Using Prais-Winsten Method**

| Mechanism                    | Age Group                       |                      |                      |                                 |                      |                      |                                 |                      |                      |                                 |                      |                      |
|------------------------------|---------------------------------|----------------------|----------------------|---------------------------------|----------------------|----------------------|---------------------------------|----------------------|----------------------|---------------------------------|----------------------|----------------------|
|                              | Ages >=15                       |                      |                      | 15-34                           |                      |                      | 35-54                           |                      |                      | >=55                            |                      |                      |
|                              | MA                              | No MA                |                      | MA                              | No MA                |                      | MA                              | No MA                |                      | MA                              | No MA                |                      |
|                              | Annual % Point Change (95%CI)** |                      |                      | Annual % Point Change (95%CI)** |                      |                      | Annual % Point Change (95%CI)** |                      |                      | Annual % Point Change (95%CI)** |                      |                      |
|                              | D                               | PW                   | PW                   |
| Occupant Motor Vehicle Crash | 1.55                            | -0.18 (-0.26, -0.10) | -0.10 (-0.18, -0.02) | 1.88                            | -0.14 (-0.22, -0.06) | -0.10 (-0.18, -0.02) | 1.66                            | -0.15 (-0.23, -0.07) | -0.10 (-0.18, -0.02) | 1.21                            | -0.38 (-0.46, -0.30) | -0.38 (-0.46, -0.30) |
| Assault with Firearm         | 1.29                            | -0.28 (-0.36, -0.20) | 0.38 (0.30, 0.46)    | 1.33                            | -0.32 (-0.40, -0.24) | 0.41 (0.33, 0.49)    | 1.36                            | 0.13 (-0.05, 0.13)   | 0.00 (0.00, 0.00)    | 1.95                            | -1.04 (-1.12, -0.96) | -1.14 (-1.22, -1.06) |
| Self-Inflicted Firearm       | 1.58                            | -0.05 (-0.13, 0.03)  | 0.21 (0.13, 0.29)    | 1.71                            | -0.38 (-0.46, -0.30) | 1.08 (0.99, 1.17)    | 1.46                            | -0.25 (-0.33, -0.17) | 0.20 (0.12, 0.28)    | 1.41                            | -0.33 (-0.41, -0.25) | -0.80 (-0.88, -0.72) |
| Unintentional                | 1.5                             | -0.15 (-0.23, -0.07) | 0.00 (0.00, 0.00)    | 1.9                             | -0.29 (-0.37, -0.21) | 0.24 (0.16, 0.32)    | 1.05                            | -0.05 (-0.13, 0.03)  | -0.10 (-0.18, -0.02) | 1.01                            | -0.38 (-0.46, -0.30) | -0.38 (-0.46, -0.30) |

|                                                                                  |        |                        |                        |        |                        |                        |        |                              |                                |        |                                |                              |
|----------------------------------------------------------------------------------|--------|------------------------|------------------------|--------|------------------------|------------------------|--------|------------------------------|--------------------------------|--------|--------------------------------|------------------------------|
| Firearm                                                                          | 7<br>5 | 0.1<br>4,<br>0.4<br>4) | 0.3<br>5,<br>0.4<br>9) | 7<br>8 | 0.2<br>0,<br>0.7<br>7) | 0.4<br>1,<br>0.9<br>0) | 5<br>5 | (-<br>0.36<br>,<br>0.26<br>) | 6 (-<br>0.5<br>0,<br>0.1<br>7) | 3<br>6 | 3 (-<br>0.6<br>4,<br>0.3<br>8) | (-<br>0.82<br>,<br>0.05<br>) |
| *p<0.05                                                                          |        |                        |                        |        |                        |                        |        |                              |                                |        |                                |                              |
| **Generalized Least Squares Estimator using Prais-Winsten method                 |        |                        |                        |        |                        |                        |        |                              |                                |        |                                |                              |
| ***From ordinary least squares regression in main analysis using moving averages |        |                        |                        |        |                        |                        |        |                              |                                |        |                                |                              |
| MA = Moving Average                                                              |        |                        |                        |        |                        |                        |        |                              |                                |        |                                |                              |
| DW = Durbin-Watson Test Statistic                                                |        |                        |                        |        |                        |                        |        |                              |                                |        |                                |                              |
| PW = Prais-Winsten                                                               |        |                        |                        |        |                        |                        |        |                              |                                |        |                                |                              |

**eTable 5. Sensitivity Analysis, Durbin-Watson Statistic and Annual Change in Percentage of Out-of-Hospital Deaths by Mechanism (2003-2013)**

|                              | Included Deaths                 |                                               |                                      |                              |                                               |
|------------------------------|---------------------------------|-----------------------------------------------|--------------------------------------|------------------------------|-----------------------------------------------|
|                              | DOA, Home, Other                |                                               | Home, Other only                     |                              |                                               |
|                              | Durbin-Watson Test Statistic*** | Prais-Winsten Annual % Point Change (95%CI)** | OLS Annual % Point Change (95% CI)** | Durbin-Watson Test Statistic | Prais-Winsten Annual % Point Change (95%CI)** |
| Occupant Motor Vehicle Crash | 1.47                            | -0.22 (-0.44, 0.00)                           | 0.03 (-0.13, 0.20)                   | 1.27                         | 0.07 (-0.14, 0.28)                            |
| Firearm Homicide             | 1.06                            | 0.11 (-0.25, 0.48)                            | 0.36 (0.10, 0.62)*                   | 1.24                         | 0.36 (0.04, 0.69)*                            |
| Firearm Suicide              | 1.43                            | 0.06(-0.28, 0.40)                             | 0.20 (-0.06, 0.45)                   | 1.54                         | 0.21 (-0.09, 0.50)                            |
| Unintentional Firearm Death  | 1.37                            | 0.56 (-0.06, 1.18)                            | 0.65 (0.16, 0.1.13)*                 | 1.62                         | 0.63 (0.09, 1.16)*                            |

\*p<0.05

\*\*Generalized Least Squares Estimator using Prais-Winsten-Winsten method

\*\*\*From ordinary least squares regression in main analysis using moving averages
